# Supplementary material
Source: PubMed Central journal article supplement (PMC3436558)
Supplement: supp_M112.381897_jbc.M112.381897-1.pdf [file supp_M112.381897_jbc.M112.381897-1.pdf]

*hHDC*

1 10 20 30 40 50

| <i>hHDC</i> | PDBID | CHAIN | SEQUENCE                                                                    |
|-------------|-------|-------|-----------------------------------------------------------------------------|
| 1JS6_A      | PDBID | CHAIN | MEP EYERERGRMVDYICQYVLSVTRER . RVTTPDVQPGYLRAQLP...ESAPEDP                  |
| 2OKJ_A      | PDBID | CHAIN | TDFSNFLFARDLLPAKNGE EQT VQFLLEVDIILLN YVRKTFDRST KVLDFPHH PQLLEGM EGFNLSHDP |

*hHDC*

60 70 80 90 100 110 120

| <i>hHDC</i> | PDBID | CHAIN | SEQUENCE                                                                                |
|-------------|-------|-------|-----------------------------------------------------------------------------------------|
| 1JS6_A      | PDBID | CHAIN | DSWDS TFGDI ER IIMP GVVHWQS PHMHAYYPALTSWPS LLGDM LADAINCLG FTWASSPACTEL EBMNVMD        |
| 2OKJ_A      | PDBID | CHAIN | DTFED TLQDV EK IIMP GVT HWHS PYFFAYFP TASSYPAMLADM LCGAIGCIG FSWAASPACTEL EBTVMMD       |
| 2OKJ_A      | PDBID | CHAIN | ESL EQ TLVDC RD TL KY GVR TGH . PRFFNQLSTGLDII GLA GEWLTS TANTNM FTY EIAPV FV LMEQITL K |

*hHDC*

130 140 150 160 170 180 190

| <i>hHDC</i> | PDBID | CHAIN | SEQUENCE                                                                                                  |
|-------------|-------|-------|-----------------------------------------------------------------------------------------------------------|
| 1JS6_A      | PDBID | CHAIN | WLAKM TLGLPEHFLHHHPSSQ GGCVLQSTV SESTLIALLAARKNKILEM KTS EPDADESC LNA RL VAYASD                           |
| 2OKJ_A      | PDBID | CHAIN | WLGKMLQLPEAPLAGEAG . EGGGVIQGSA SEATLVALLAARTKVVRRLQAA SPGLTQGA VLE KL VAYASD                             |
| 2OKJ_A      | PDBID | CHAIN | KMR E TLV G . . . . . WSSKD G DGI F S PGG AIS NMY SIMAAR YKYFP E V KTK G . . . . . MA AV P KL V L F T S E |

*hHDC*

200 210 220 230 240 250

| <i>hHDC</i> | PDBID | CHAIN | SEQUENCE                                                                         |
|-------------|-------|-------|----------------------------------------------------------------------------------|
| 1JS6_A      | PDBID | CHAIN | QAHSSVEKAGLIS . . LVKMKFLPVDNFSLRG EALQKAI EEDKQRGLVVFVVCATLGTGVC AFDCLLS E      |
| 2OKJ_A      | PDBID | CHAIN | QAHSSVERAGLIG . . GVKLKAIPSDGKFAMRRASALQEALERDKAAGLIPFFV VVATLGTTSCCSFDNLL E     |
| 2OKJ_A      | PDBID | CHAIN | QSHY SIKKAGAA LGFGTDNVIL ICKNERG KIIIPADF EAKILEAKQKGYVBFYV NATA GTTVYGA FDFPIQE |

*hHDC*

260 270 280 290 300 310 320

| <i>hHDC</i> | PDBID | CHAIN | SEQUENCE                                                                              |
|-------------|-------|-------|---------------------------------------------------------------------------------------|
| 1JS6_A      | PDBID | CHAIN | LGP TCA REGLWLWHIDAA YACTAF LCP EFRGFLKGEHYADSF TFPNPSKWMVHFDC TGFVVKDKYKIQ QTF       |
| 2OKJ_A      | PDBID | CHAIN | VGP TCH EED IWLHV DAA YAGSAFI CPEFRHRLN GVEFADSFNF NPHKWL VNFDCS AMWVKRR TDLTGAFN     |
| 2OKJ_A      | PDBID | CHAIN | IAD TCEKYNLWLHV DAA WEGGLMSRKH RHKLN GHERANS V T W NPHKMMGV L LQCS A I L VKEKGLIQ GCN |

*hHDC*

| *hHDC* | PDBID | CHAIN | SEQUENCE |
| --- | --- | --- | --- |
| 1JS6\_A | PDBID | CHAIN | SVNPI YLRHAN . . SGVATDFMHWQIPLSRFRFSVRLWVFI R SFGVKNLQAHV RHGTEMAKYFESLVRNDP |
| 2OKJ\_A | PDBID | CHAIN | KLDPV YLKHSHQSGSLITD YRHWQLPLGRFRFRSLKMFVFRMYGVKGLQAYIRKHVQLSHEFEAFVQLQDP |
| 2OKJ\_A | PDBID | CHAIN | QMCAC YL FQPDKQYD VSYD TGD KAI QCGRHVD I L F K F W L M W K A K G T V G F E N Q I N K K L E L A E Y L Y A K I L K N R E |

*hHDC*

| *hHDC* | PDBID | CHAIN |
| --- | --- | --- |

**Supplementary Figure S1.** Deduced amino acid sequence alignment of hHDC (UniProt ID: P19113, PDB ID: 4E1O), pig DDC (UniProt ID: P80041, PDB ID: 1JS6), and human GAD67 (UniProt ID: Q99259, PDB ID: 2OKJ) using ClustalW. The conserved regions are highlighted in red. The secondary structures of hHDC are indicated above the sequence.
