# Supplementary material
Source: PubMed Central journal article supplement (PMC3436558)
Supplement: supp_M112.381897_jbc.M112.381897-2.pdf [file supp_M112.381897_jbc.M112.381897-2.pdf]

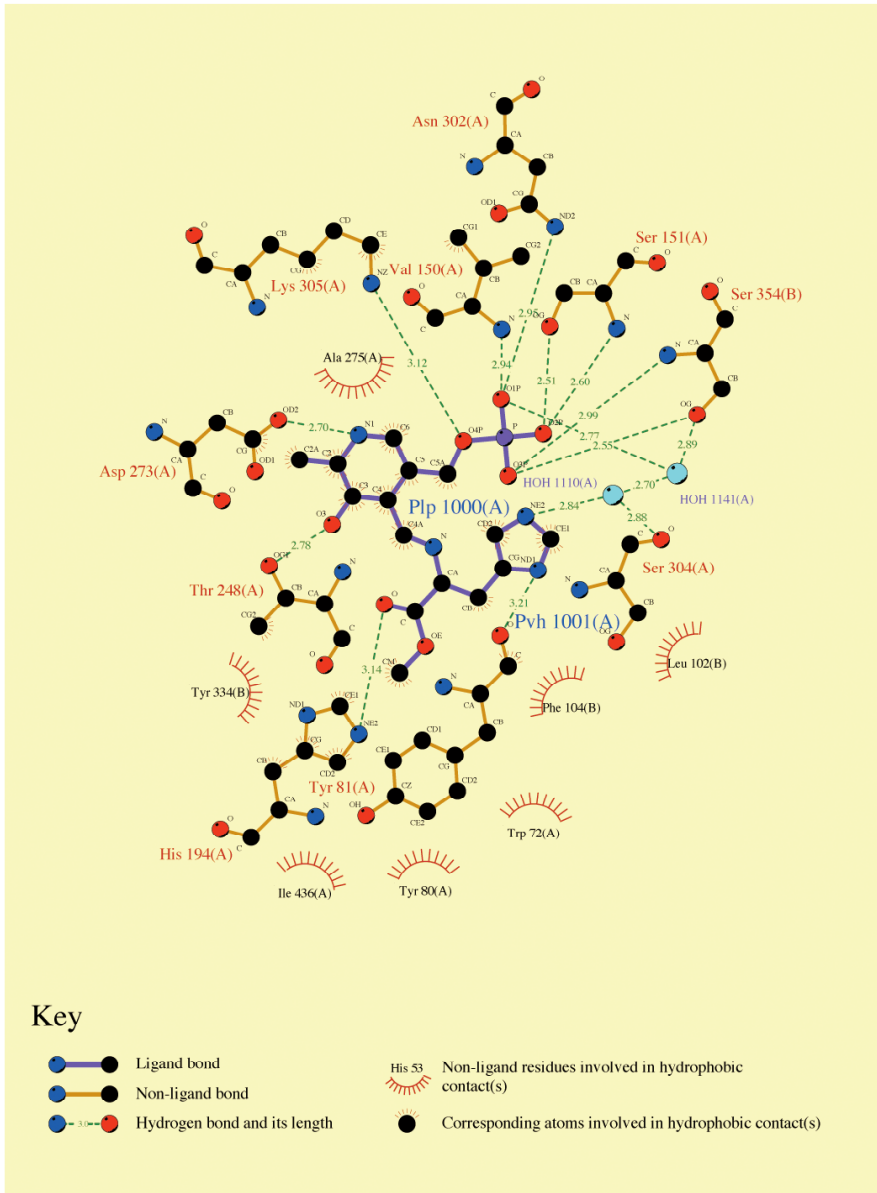

**Supplementary Figure S2.** Schematic diagram of protein-ligand interactions generated by LIGPLOT. Hydrogen bonds are green dashed lines. Hydrophobic contacts with the ligand are presented by red semi-circles with radiating spokes.
