# Supplementary material
Source: PubMed Central journal article supplement (PMC3436558)
Supplement: supp_M112.381897_jbc.M112.381897-3.pdf [file supp_M112.381897_jbc.M112.381897-3.pdf]

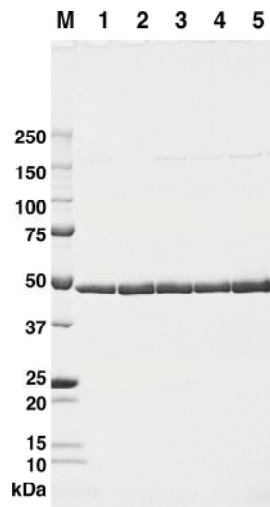

**Supplementary Figure S3.** SDS-PAGE of purified hHDCs. 1: hHDC<sup>2-477</sup>, 2: double mutant(C179S and C417S), 3: K305G, 4: Y334F, 5: S354G. Molecular weight marker proteins at left end: 250, 150, 100, 75, 50, 37, 25, 20, 15, and 10 kDa.
