# Supplementary material
Source: PubMed Central journal article supplement (PMC3436558)
Supplement: supp_M112.381897_jbc.M112.381897-4.pdf [file supp_M112.381897_jbc.M112.381897-4.pdf]

**Supplementary Table S1.**

Hydrophilic interaction liquid chromatography (HILIC)- electrospray ionization (ESI) tandem mass spectrometry (MS/MS) conditions

| HILIC conditions                     |                                                                    |                          |                          |
|--------------------------------------|--------------------------------------------------------------------|--------------------------|--------------------------|
| Column                               | ZIC-HILIC<br>150 × 2.1 mm (internal diameter) 5 μm (particle size) |                          |                          |
| Mobile phase A                       | Ammonium formate 10 mM (pH 3.0)                                    |                          |                          |
| Mobile phase B                       | Acetonitrile                                                       |                          |                          |
| Gradient condition                   | time (min)                                                         | % mobile phase B         |                          |
|                                      | 0                                                                  | 87                       |                          |
|                                      | 1                                                                  | 87                       |                          |
|                                      | 14                                                                 | 25                       |                          |
|                                      | 16                                                                 | 25                       |                          |
|                                      | 17                                                                 | 87                       |                          |
|                                      | 32                                                                 | 87                       |                          |
| Flow rate                            | 150 μl/min                                                         |                          |                          |
| Injection volume                     | 5 μl                                                               |                          |                          |
| Column temperature                   | Room temperature                                                   |                          |                          |
| API 3000 MS/MS conditions            |                                                                    |                          |                          |
|                                      | dopamine<br>(MRM 154/137)                                          | dopamine<br>(MRM 154/91) | dopamine<br>(MRM 154/65) |
| Polarity                             |                                                                    | ESI+                     |                          |
| Ion spray voltage (V)                |                                                                    | 5000                     |                          |
| Nebulizer gas                        |                                                                    | 8                        |                          |
| Curtain gas                          |                                                                    | 6                        |                          |
| Temperature (°C)                     |                                                                    | 450                      |                          |
| Collision activated dissociation gas |                                                                    | 6                        |                          |
| Declustering potential (V)           |                                                                    | 50                       |                          |
| Focusing potential (V)               |                                                                    | 250                      |                          |
| Entrance potential (V)               |                                                                    | 10                       |                          |
| Collision energy (V)                 | 10                                                                 | 30                       | 50                       |
| Collision cell exit potential (V)    | 8                                                                  | 6                        | 14                       |
| MRM transition                       | <i>m/z</i> 154→137                                                 | <i>m/z</i> 154→91        | <i>m/z</i> 154→65        |
